# Supplementary material
Source: HighWire-hosted journal article supplement (https://bmjopen.bmj.com/content/6/10/e012702)
Supplement: inline-supplementary-material-1 [file inline-supplementary-material-1.pdf]

Supplementary data

Table 1: diagnostic tests for each of the questions in each of the groups:

|                                                 |                              | Sensitivity Estimate[lower-upper] | Specificity Estimate[lower-upper] | Odds ratio Estimate [lower-upper] | Positive predictive value Estimate [lower-upper] | Negative predictive value Estimate [lower-upper] | Positive likelihood ratio Estimate[lower-upper] | Negative likelihood ratio Estimate[lower-upper] |
|-------------------------------------------------|------------------------------|-----------------------------------|-----------------------------------|-----------------------------------|--------------------------------------------------|--------------------------------------------------|-------------------------------------------------|-------------------------------------------------|
| <b>Prospective cohort</b>                       | ≥2 affirmative answers       | 0.84[0.68,0.94]                   | 0.87[0.83,0.90]                   | 33.96[13.61,84.78]                | 0.34[0.24,0.44]                                  | 0.98[0.97,1.00]                                  | 6.34[4.83,8.34]                                 | 0.19[0.09,0.39]                                 |
|                                                 | Question 1 answered as "yes" | 0.96[0.82,0.99]                   | 0.79[0.75,0.83]                   | 66.72[15.77,282.32]               | 0.27[0.19,0.35]                                  | 0.99[0.98,1.00]                                  | 4.55[3.75,5.53]                                 | 0.07[0.02,0.26]                                 |
|                                                 | Question 2 answered as "yes" | 0.73[0.39,0.94]                   | 0.89[0.82,0.94]                   | 21.33[5.10,89.27]                 | 0.35[0.16,0.57]                                  | 0.98[0.93,0.99]                                  | 6.54[3.60,11.91]                                | 0.31[0.12,0.81]                                 |
|                                                 | Question 3 answered as "yes" | 0.68[0.50,0.82]                   | 0.79[0.75,0.82]                   | 7.74[3.75,15.95]                  | 0.20[0.14,0.29]                                  | 0.97[0.95,0.98]                                  | 3.19[2.40,4.23]                                 | 0.41[0.26,0.66]                                 |
|                                                 | Question 4 answered as "yes" | 0.11[0.03,0.25]                   | 1.00[0.99,1.00]                   | Infinite                          | 1.00[0.28,1.00]                                  | 0.93[0.91,0.95]                                  | Infinite                                        | 0.89[0.80,1.00]                                 |
| <b>External retrospective validation cohort</b> | ≥2 affirmative answers       | 0.80[0.69,0.88]                   | 0.95[0.84,0.97]                   | 83.3[43.13,159.83]                | 0.62[0.51,0.72]                                  | 0.98[0.97,0.99]                                  | 17.41[12.46,24.32]                              | 0.21[0.13,0.33]                                 |
|                                                 | Question 1 answered as "yes" | 0.95[0.87,0.99]                   | 0.91[0.89,0.93]                   | 177.99[63.19,501.32]              | 0.49[0.41,0.58]                                  | 0.99[0.99,1.00]                                  | 10.44[8.33,13.08]                               | 0.06[0.02,0.15]                                 |
|                                                 | Question 2 answered as "yes" | 0.53[0.41,0.65]                   | 0.96[0.94,0.97]                   | 26.74[15.09,47.37]                | 0.55[0.43,0.66]                                  | 0.96[0.94,0.97]                                  | 13.01[8.76,19.32]                               | 0.49[0.38,0.62]                                 |
|                                                 | Question 3 answered as "yes" | 0.37[0.28,0.51]                   | 0.93[0.91,0.94]                   | 7.97[4.67,13.61]                  | 0.33[0.23,0.44]                                  | 0.94[0.92,0.96]                                  | 5.28[3.62,7.69]                                 | 0.66[0.55,0.79]                                 |
|                                                 | Question 4 answered as "yes" | 0.23[0.14,0.38]                   | 1.00[0.99,1.00]                   | Infinite                          | 1.00[0.73,1.00]                                  | 0.93[0.91,0.95]                                  | Infinite                                        | 0.77[0.68,0.87]                                 |
